# Supplementary material for: CAM-Xenograft Model Provides Preclinical Evidence for the Applicability of [68Ga]Ga-Pentixafor in CRC Imaging
Source: MDPI journal article supplement (doi:10.3390/cancers14225549), 2022-11-11
Supplement: s1 [file s1]

## Supplementary Materials

**Table S1.** Overview on performed scans and subjects

| egg-ID   | CAM-xenograft model | <sup>68</sup> Ga]Ga-Pentixafor baseline |                           |                         |                        | <sup>68</sup> Ga]Ga-Pentixafor blocking |                           |                         |                        | 2-[ <sup>18</sup> F]FDG |                           |          |                        |
|----------|---------------------|-----------------------------------------|---------------------------|-------------------------|------------------------|-----------------------------------------|---------------------------|-------------------------|------------------------|-------------------------|---------------------------|----------|------------------------|
|          |                     | EDD                                     | PET-scan start [min p.i.] | injected peptide [nmol] | tumour uptake [%TA/cc] | EDD                                     | PET-scan start [min p.i.] | injected peptide [nmol] | tumour uptake [%TA/cc] | EDD                     | PET-scan start [min p.i.] | IA [MBq] | tumour uptake [%TA/cc] |
| 06.22_02 | HT29                | 18                                      | 60                        | 2.32                    | 7.98                   |                                         |                           |                         |                        |                         |                           |          |                        |
| 06.22_03 |                     | 16                                      | 72                        | 2.82                    | 6.74                   | 17                                      | 60                        | 2.70                    | 5.11                   |                         |                           |          |                        |
| 06.22_07 |                     | 15                                      | 60                        | 0.47                    | 11.26                  | 16                                      | 60                        | 0.93                    | 3.57                   |                         |                           |          |                        |
| 06.22_13 |                     | 16                                      | 60                        | 3.81                    | 5.09                   |                                         |                           |                         |                        |                         |                           |          |                        |
| 06.22_25 |                     | 16                                      | 60                        | 1.42                    | 8.30                   |                                         |                           |                         |                        |                         |                           |          |                        |
| 06.22_28 |                     | 17                                      | 60                        | 2.39                    | 8.07                   |                                         |                           |                         |                        |                         |                           |          |                        |
| 06.22_50 |                     | 16                                      | 60                        | 1.83                    | 7.13                   |                                         |                           |                         |                        |                         |                           |          |                        |
| 06.22_55 |                     |                                         |                           |                         |                        | 16                                      | 60                        | 2.10                    | 3.47                   |                         |                           |          |                        |
| 06.22_14 |                     |                                         |                           |                         |                        |                                         |                           |                         |                        | 18                      | 60                        | 5.31     | 10.0                   |
| 06.22_34 |                     |                                         |                           |                         |                        |                                         |                           |                         |                        | 18                      | 60                        | 8.30     | 6.62                   |
| 06.22_41 |                     |                                         |                           |                         |                        |                                         |                           |                         |                        | 18                      | 60                        | 8.94     | 10.7                   |
| 06.22_20 | HCT116              | 17                                      | 60                        | 2.60                    | 3.13                   |                                         |                           |                         |                        |                         |                           |          |                        |
| 06.22_23 |                     | 16                                      | 60                        | 3.40                    | 3.19                   | 17                                      | 60                        | 1.09                    | 2.92                   |                         |                           |          |                        |
| 06.22_29 |                     | 15                                      | 60                        | 1.85                    | 5.06                   | 16                                      | 60                        | 0.94                    | 2.48                   |                         |                           |          |                        |
| 06.22_46 |                     | 16                                      | 60                        | 0.79                    | 3.31                   | 17                                      | 60                        | 3.12                    | 2.90                   | 18                      | 60                        | 5.12     | 9.02                   |
| 06.22_49 |                     | 18                                      | 60                        | 1.94                    | 3.23                   | 16                                      | 60                        | 3.28                    | 2.19                   | 19                      | 60                        | 6.50     | 8.17                   |
| 06.22_54 |                     | 16                                      | 60                        | 2.79                    | 5.48                   | 17                                      | 82                        | 2.85                    | 3.41                   | 18                      | 73                        | 2.48     | 11.0                   |
| 06.22_66 |                     | 16                                      | 60                        | 4.05                    | 3.84                   | 17                                      | 62                        | 2.60                    | 3.59                   |                         |                           |          |                        |
| 06.22_70 |                     | 16                                      | 60                        | 2.46                    | 6.76                   | 17                                      | 60                        | 1.75                    | 5.76                   | 18                      | 60                        | 4.21     | 9.89                   |
| 06.22_73 |                     | 16                                      | 60                        | 2.88                    | 3.57                   | 17                                      | 60                        | 6.36                    | 3.50                   |                         |                           |          |                        |

Identifier (ID)

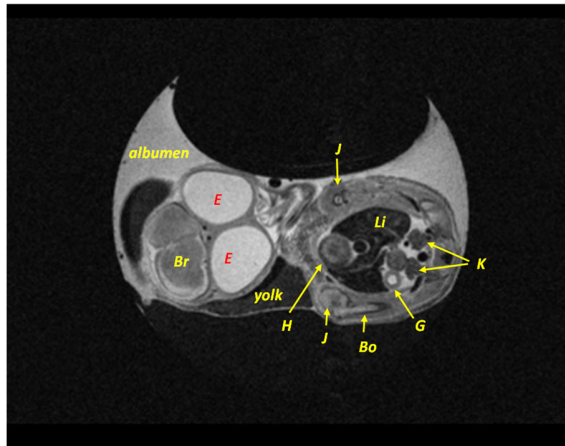

(a)

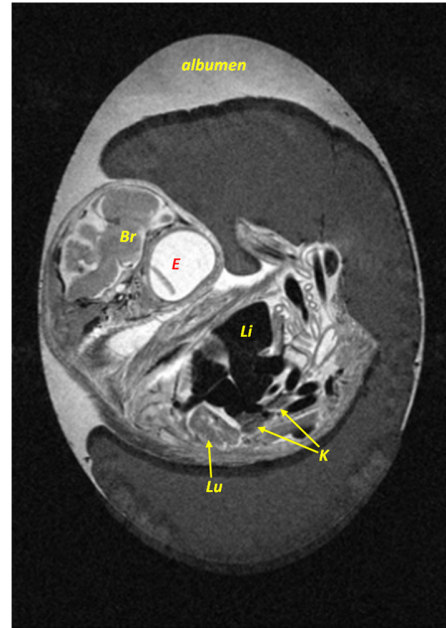

(b)

**Figure S1.** T2-weighted TurboRARE MR images of the chick embryo on EDD18: (a) axial plane and (b) coronal plane. Organs to be delineated and other tissues of the chicken egg are stated or marked with a yellow arrow: Bo (bones – tarsometatarsus), Br (brain), E (eye), G (gizzard), H (heart), J (joints - intertarsal), K (kidneys), Li (liver), Lu (lungs), as well as albumen and yolk.

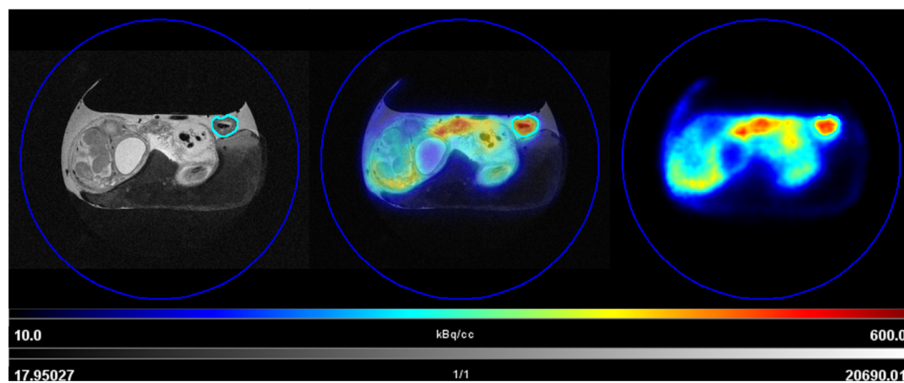

**Figure S2.** Example for VOI positioning for CAM-xenograft. Xenograft-VOIs were manually drawn based on the MR information from the T2-weighted TurboRARE scans. Left: T2-weighted TurboRARE image, right: PET, middle: fused PET and MR (axial planes are shown). Xenografts (turquoise VOI) are marked with a yellow arrow.

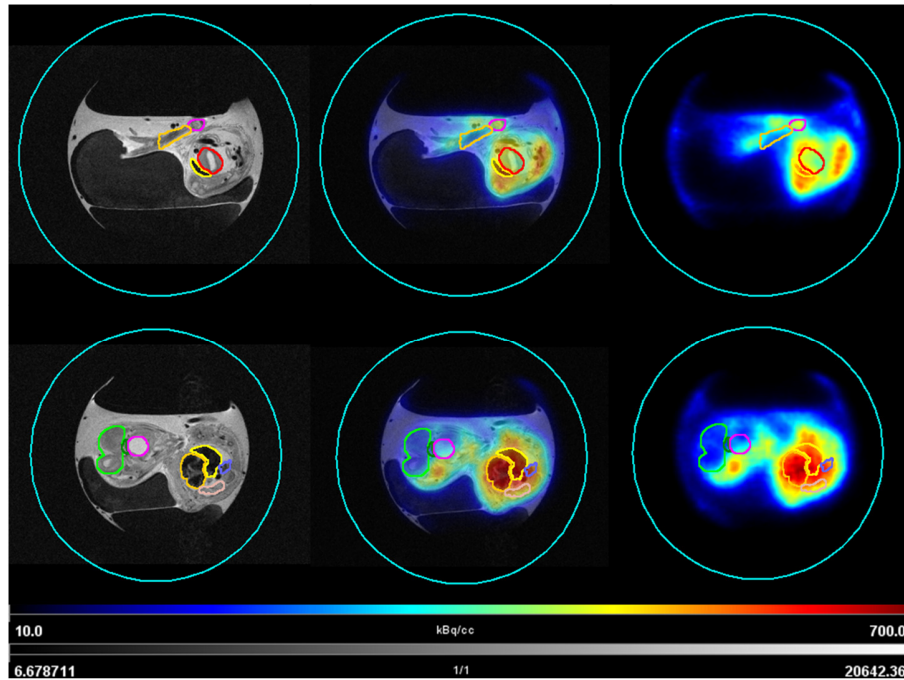

**Figure S3.** Example for VOI positioning for different organs and other tissues within the chicken egg. VOIs were manually drawn based on the MRI information from the T2-weighted TurboRARE scans. VOIs for joints and bones were manually drawn based on the fused PET/MR images. For albumen and yolk, a sphere, 2 mm in radius, was positioned in albumen or yolk, respectively. Total activity was calculated based on a spherical VOI with 30 mm radius around the whole egg. Left: T2-weighted TurboRARE images, right: PET, middle: fused PET and MR (axial planes are shown). Upper row: Bone (tarsometatarsus) – orange, joint (intertarsal) – pink, gizzard – red, liver – yellow, whole egg – turquoise. Lower row: Brain – green, eye – pink, heart – orange, liver – yellow, lung – rose, kidney – blue, whole egg – turquoise.

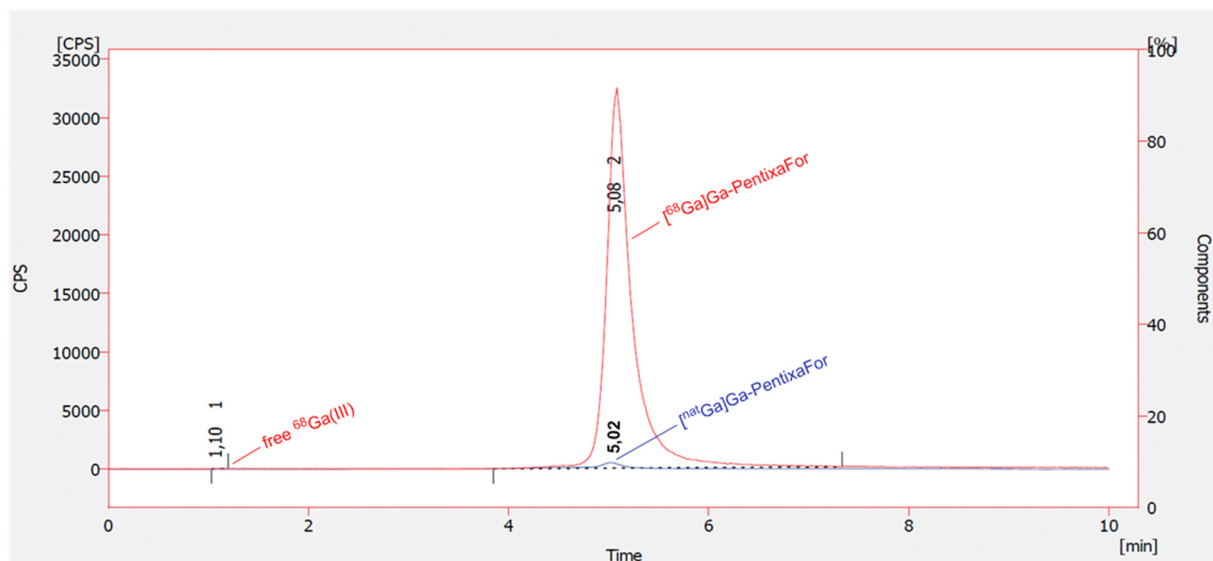

Result Table (Uncal - Detector 1)

|       | Reten. Time<br>[min] | Area<br>[CPS.s] | Height<br>[CPS] | Area<br>[%] | Height<br>[%] | W05<br>[min] |
|-------|----------------------|-----------------|-----------------|-------------|---------------|--------------|
| 1     | 1.100                | 182.000         | 39.400          | 0.0         | 0.1           | 0.08         |
| 2     | 5.083                | 580700.000      | 32477.933       | 100.0       | 99.9          | 0.25         |
| Total |                      | 580882.000      | 32517.333       | 100.0       | 100.0         |              |

Result Table (Uncal - UV-220nm)

|       | Reten. Time<br>[min] | Area<br>[mAU.s] | Height<br>[mAU] | Area<br>[%] | Height<br>[%] | W05<br>[min] |
|-------|----------------------|-----------------|-----------------|-------------|---------------|--------------|
| 1     | 5.020                | 15010.114       | 523.184         | 100.0       | 100.0         | 0.24         |
| Total |                      | 15010.114       | 523.184         | 100.0       | 100.0         |              |

**Figure S4.** Representative radio-HPLC chromatogram of  $[^{68}\text{Ga}]\text{Ga-PentixaFor}$  (red) with the co-injected standard  $[\text{natGa}]\text{Ga-Pentixafor}$  (blue)

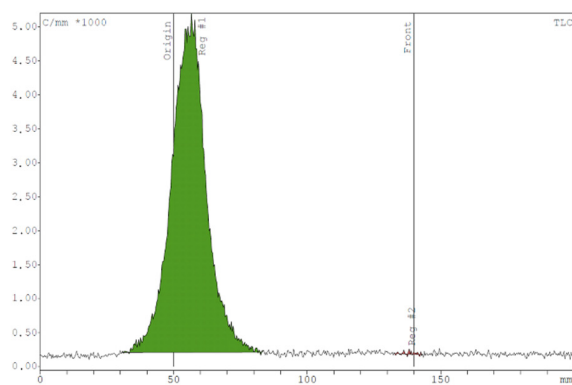

Integration TLC

| Substance       | R/F   | %Total<br>% | Type  | Area<br>Counts | %Area<br>% |
|-----------------|-------|-------------|-------|----------------|------------|
| Reg #1          | 0.081 | 65.92       | BB(-) | 74202.57       | 99.89      |
| Reg #2          | 0.985 | 0.07        | BB(-) | 80.64          | 0.11       |
| Sum in ROI      | -     | -           | -     | 74283.21       | 100.00     |
| Total area      | -     | -           | -     | 112572.00      | -          |
| Area (total) RF | -     | -           | -     | 79822.00       | -          |

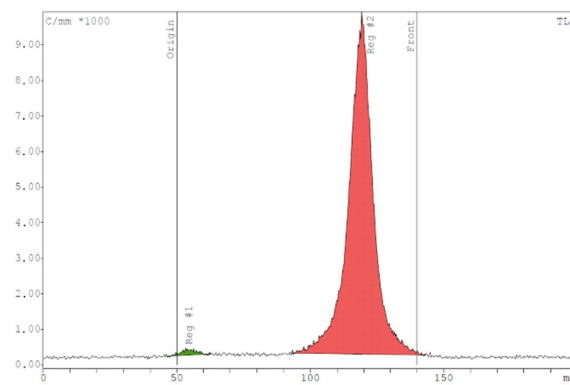

Integration TLC

| Substance       | R/F   | %Total<br>% | Type  | Area<br>Counts | %Area<br>% |
|-----------------|-------|-------------|-------|----------------|------------|
| Reg #1          | 0.044 | 0.65        | BB(-) | 1002.4         | 0.98       |
| Reg #2          | 0.770 | 65.85       | BB(-) | 100936.9       | 99.02      |
| Sum in ROI      | -     | -           | -     | 101939.3       | 100.00     |
| Total area      | -     | -           | -     | 153283.0       | -          |
| Area (total) RF | -     | -           | -     | 128714.0       | -          |

**Figure S5.** Representative TLC-chromatogram of  $[^{68}\text{Ga}]\text{Ga-Pentixafor}$  using 0.1 M Na-citrate (left) and 1.0 M ammonium acetate/methanol (right) as solvent

**Table S2.** Uptake of [<sup>68</sup>Ga]Ga-Pentixafor in HT29 and HCT116 cells.

| Cellular fractions          | HT29 cells [%AD/10 <sup>6</sup> cells] | HCT116 cells [%AD/10 <sup>6</sup> cells] |
|-----------------------------|----------------------------------------|------------------------------------------|
| Total membrane binding      | 1.73 ± 0.44                            | 0.20 ± 0.13                              |
| Unspecific membrane binding | 0.08 ± 0.04                            | 0.15 ± 0.08                              |
| Specific membrane binding   | 1.55 ± 0.39                            | 0.07 ± 0.05                              |
| Total internalisation       | 0.46 ± 0.10                            | 0.09 ± 0.04                              |
| Unspecific internalisation  | 0.07 ± 0.03                            | 0.05 ± 0.03                              |
| Specific internalisation    | 0.40 ± 0.10                            | 0.03 ± 0.02                              |

**Table S3.** Uptake of [<sup>68</sup>Ga]Ga-Pentixafor in CAM-xenografts derived from HT29 and HCT116 cells.

|                   | HT29 CAM-xenografts [%TA/cc] | HCT116 CAM-xenografts [%TA/cc] |
|-------------------|------------------------------|--------------------------------|
| Total uptake      | 7.80 ± 1.88 ( <i>n</i> = 7)  | 4.17 ± 1.29 ( <i>n</i> = 9)    |
| Unspecific uptake | 4.05 ± 0.92 ( <i>n</i> = 3)  | 3.34 ± 1.09 ( <i>n</i> = 8)    |

**Table S4.** Accumulation of [<sup>68</sup>Ga]Ga-Pentixafor in organs and other tissues within the chicken egg

| VOI     | Baseline condition [%TA/cc] | Blocking condition [%TA/cc] |
|---------|-----------------------------|-----------------------------|
| Brain   | 4.73 ± 0.24                 | 3.78 ± 0.18                 |
| Eyes    | 3.53 ± 0.22                 | 3.10 ± 0.27                 |
| Liver   | 10.26 ± 1.08                | 10.49 ± 1.09                |
| Heart   | 10.65 ± 1.03                | 10.00 ± 0.92                |
| Kidney  | 10.18 ± 0.87                | 9.58 ± 0.52                 |
| Lungs   | 9.52 ± 0.66                 | 8.83 ± 0.21                 |
| Gizzard | 8.17 ± 0.88                 | 7.53 ± 0.61                 |
| Joints  | 7.71 ± 0.23                 | 7.27 ± 0.94                 |
| Bones   | 5.05 ± 0.91                 | 5.76 ± 0.58                 |
| Albumen | 1.35 ± 0.26                 | 1.62 ± 0.57                 |
| Yolk    | 0.54 ± 0.56                 | 0.38 ± 0.13                 |

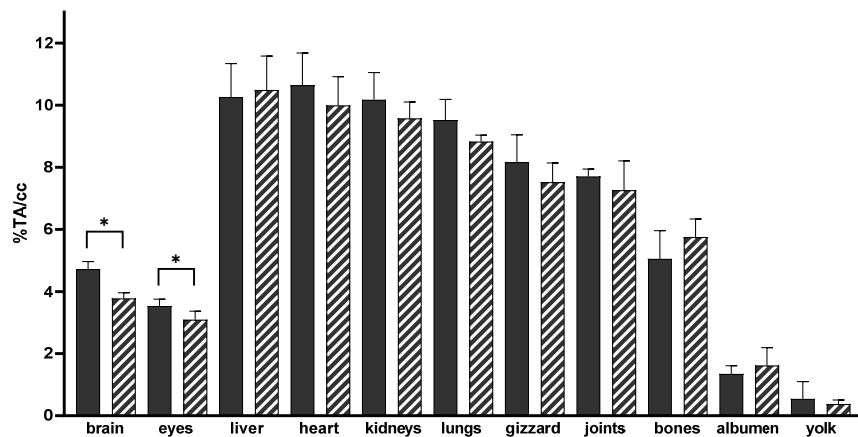

**Figure S6.** Distribution of [ $^{68}\text{Ga}$ ]Ga-Pentixafor under baseline (filled bars) and blocking (bars with pattern) conditions. Data is depicted as % total activity per  $\text{cm}^3$  (%TA/cc) and presented as mean  $\pm$  SD ( $n = 4$ ). Significant differences ( $p < 0.05$ ) are marked with an asterisk (\*).

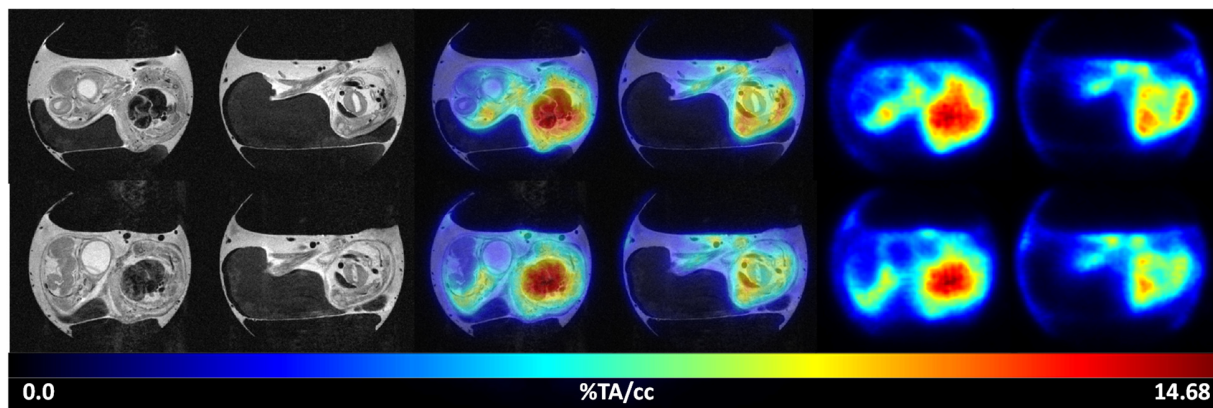

**Figure S7.** Representative images of [ $^{68}\text{Ga}$ ]Ga-Pentixafor distribution in the chick embryonal organism. Upper row: [ $^{68}\text{Ga}$ ]Ga-Pentixafor baseline after injection of 8.73 MBq (2.46 nmol peptide) into a CAM-vessel on EDD16. Lower row: [ $^{68}\text{Ga}$ ]Ga-Pentixafor distribution under blocking conditions in the same egg. Imaging was performed on the following day (EDD17) after injection of 315  $\mu\text{g}$  AMD3100 and 15.42 MBq [ $^{68}\text{Ga}$ ]Ga-Pentixafor (1.75 nmol peptide). PET imaging was performed 60 min p.i. Left: T2-weighted TurboRARE image, right: PET, middle: fused PET and MR (axial planes are shown).

**Table S5.** Accumulation of 2-<sup>[18F]</sup>FDG in embryonal organs as well as HT29 and HCT116 CAM-xenografts

| VOI              | Uptake [%TA/cc] |
|------------------|-----------------|
| HT29-xenograft   | 9.12 ± 2.19     |
| HCT116-xenograft | 9.53 ± 1.22     |
| Brain            | 7.27 ± 1.13     |
| Eyes             | 6.31 ± 0.81     |
| Liver            | 7.36 ± 1.18     |
| Heart            | 6.86 ± 1.00     |
| Kidneys          | 7.86 ± 0.39     |
| Lungs            | 6.11 ± 1.00     |
| Gizzard          | 5.63 ± 0.94     |
| Joints           | 8.49 ± 1.53     |
| Bones            | 5.40 ± 0.55     |
| Albumen          | 1.56 ± 1.06     |
| Yolk             | 0.36 ± 0.15     |

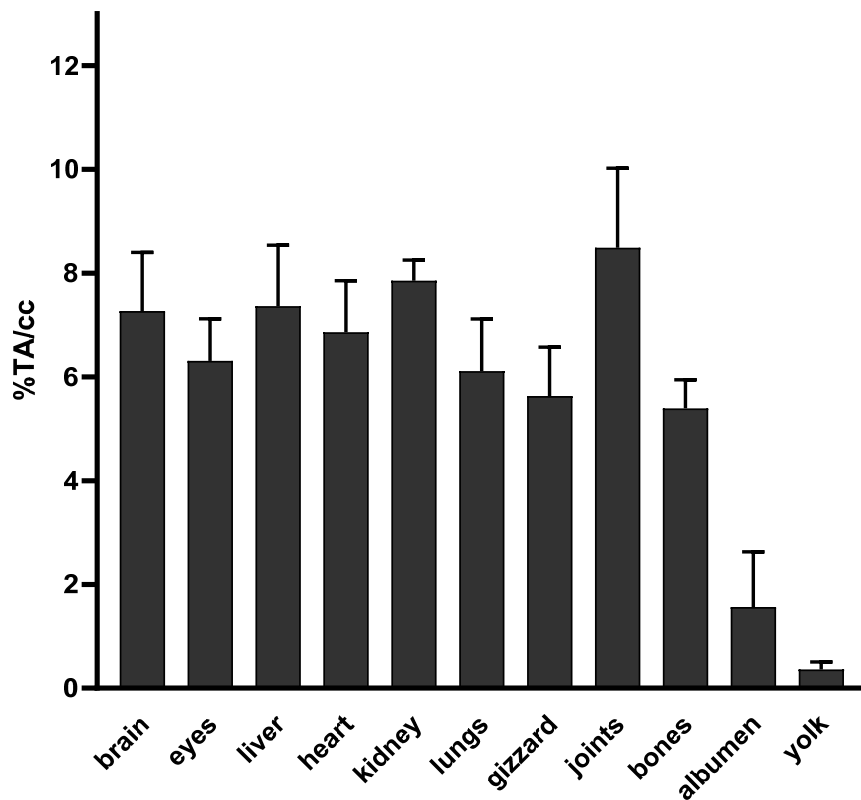

**Figure S8.** 2-<sup>[18F]</sup>FDG distribution in chick embryonal organs, albumen and yolk. Data is depicted as %TA/cc and presented as mean ± SD (*n* = 3).

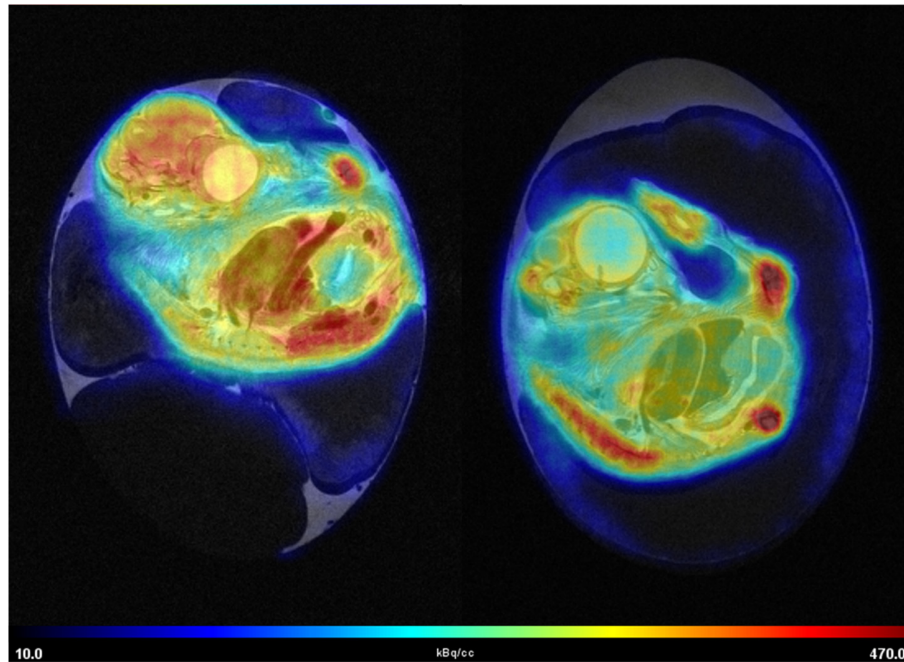

**Figure S9.** Selected PET/MR images of 2- $^{18}\text{F}$ FDG uptake in two different subjects. Left: Imaging was performed on EDD18 60 min after injection of 8.94 MBq 2- $^{18}\text{F}$ FDG using the radiopharmaceutical preparation 30 min after radiosynthesis. Right: Imaging was performed on EDD18 60 min after injection of 5.31 MBq 2- $^{18}\text{F}$ FDG using the radiopharmaceutical preparation 6 h after radiosynthesis. In both images, a fused T2-weighted TurboRARE image and PET image in the coronal plane is shown.

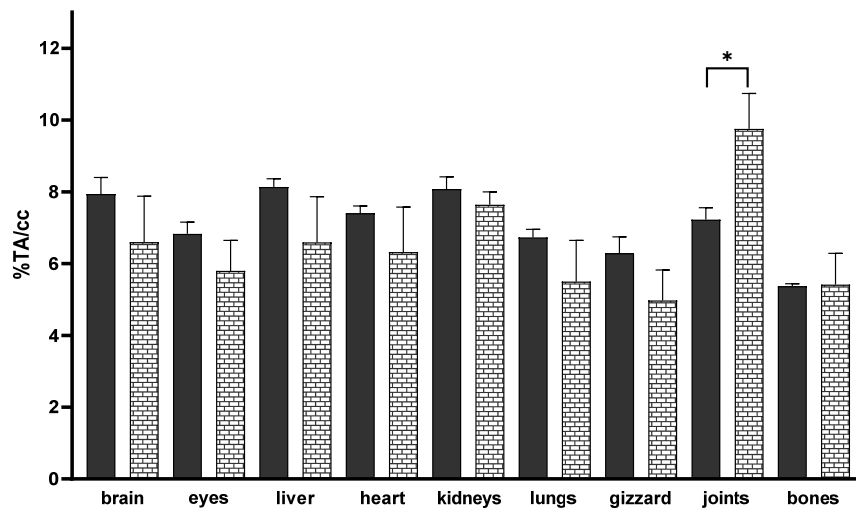

**Figure S10.** Comparison of 2- $^{18}\text{F}$ FDG uptake into different organs and tissues of the chick embryo when performing the scan early (up to 2.5 h after radiolabelling, filled bars) or later (more than 5.5 h after radiolabelling, bars with pattern) during the day. Data is depicted as %TA/cc and presented as mean  $\pm$  SD ( $n \geq 3$ ). Significant differences ( $p < 0.05$ ) are marked with an asterisk (\*).
